# Supplementary material for: The small GTPase, nucleolar GTP-binding protein 1 (NOG1), has a novel role in plant innate immunity
Source: PubMed Central journal article supplement (PMC5569028; doi:10.1038/s41598-017-08932-9), 2017-08-23
Supplement: 41598_2017_8932_MOESM1_ESM.pdf [file 41598_2017_8932_MOESM1_ESM.pdf]

# **The small GTPase, nucleolar GTP-binding protein 1 (NOG1), has a novel role in plant innate immunity**

Seonghee Lee<sup>1,2</sup>, Muthappa Senthil-Kumar<sup>1,6</sup>, Miyoung Kang<sup>3</sup>, Clemencia M. Rojas<sup>1,5</sup>, Yuhong Tang<sup>1</sup>, Sunhee Oh<sup>1</sup>, Swarup Roy Choudhury<sup>4</sup>, Hee-Kyung Lee<sup>1</sup>, Yasuhiro Ishiga<sup>1,7</sup>, Randy D. Allen<sup>3</sup>, Sona Pandey<sup>4</sup> and Kirankumar S. Mysore<sup>1\*</sup>

<sup>1</sup> Noble Research Institute, LLC., Ardmore, Oklahoma, USA

<sup>2</sup> Gulf Coast Research and Education Center, Institute of Food and Agricultural Science, University of Florida, Wimauma, Florida, USA

<sup>3</sup> Institute for Agricultural Biosciences, Oklahoma State University, Ardmore, Oklahoma, USA

<sup>4</sup> Donald Danforth Plant Science Center, St. Louis, Missouri, USA

<sup>5</sup> Current Address: Department of Plant Pathology, University of Arkansas, Fayetteville, Arkansas, USA

<sup>6</sup> Current Address: National Institute of Plant Genome Research, Aruna Asaf Ali Marg, New Delhi, India

<sup>7</sup> Current Address: Department of Plant Pathology, University of Tsukuba, Ibaraki, Japan

\*Correspondence to: Kiran Mysore, Noble Research Institute, 2510 Sam Noble Pky. Ardmore, Oklahoma 73401 U.S.A.

Phone: 580-224-6740

email: [kmysore@noble.org](mailto:kmysore@noble.org)

# Figure S1

A

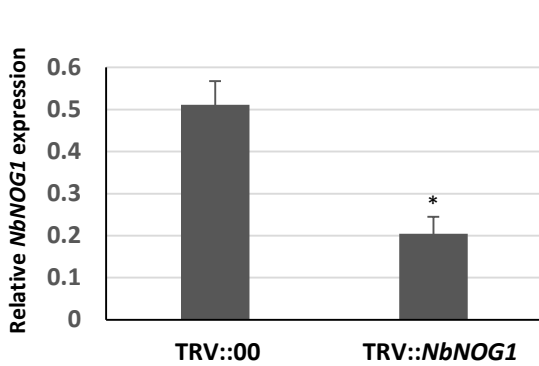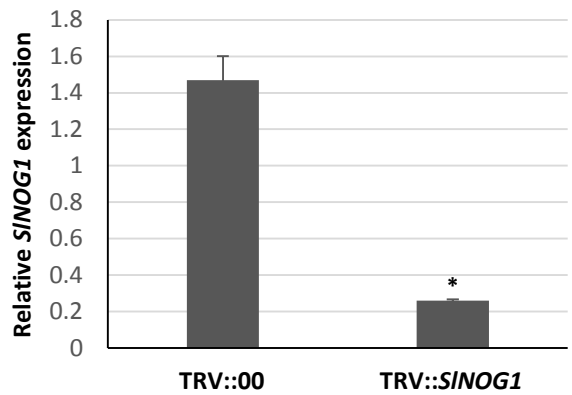

B

## *P. syringae* pv. *glycinea*

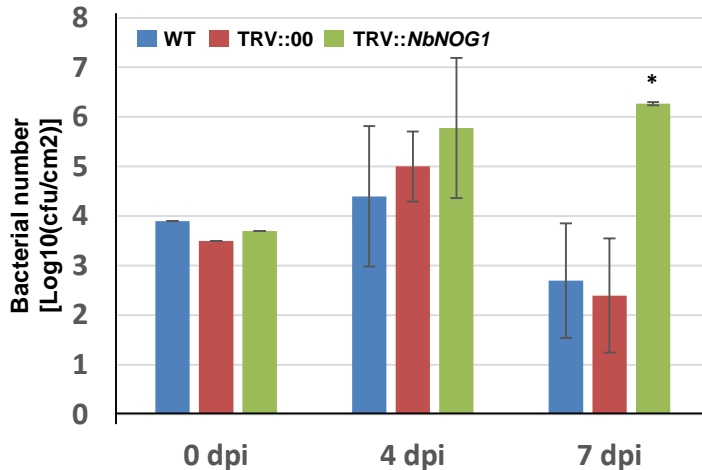

C

## *X. campestris* pv. *vesicatoria*

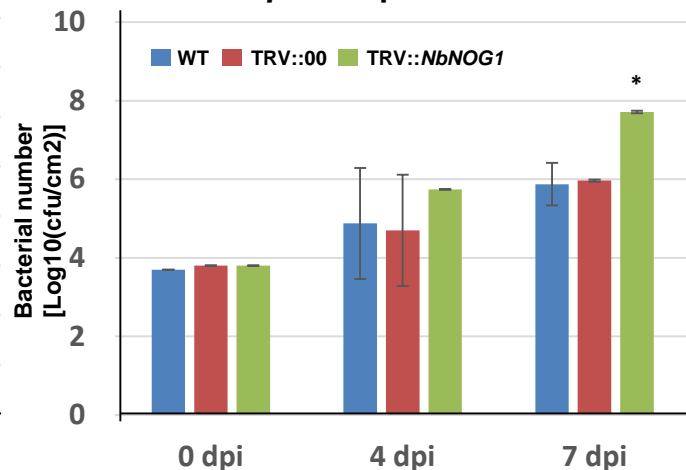

**Figure S1. *Nicotiana benthamiana* *NbNOG1*-silenced plants are compromised in nonhost disease resistance against different nonhost pathogens such as *P. syringae* pv. *glycinea* and *X. campestris* pv. *vesicatoria*.** (A) The level of down-regulation of *NbNOG1* was quantified in control (TRV::00) and *NbNOG1*-silenced *N. benthamiana* plants. The expression of *NbActin* was used as internal control. (B) *NbNOG1*-silenced (TRV::*NbNOG1*) and non-silenced control (TRV::00) *N. benthamiana* plants were vacuum-infiltrated with *P. syringae* pv. *glycinea* (B) and *X. campestris* pv. *vesicatoria* (C). Bacterial growth was monitored at 0, 4 and 7 days post-inoculation.

# Figure S2

**A**

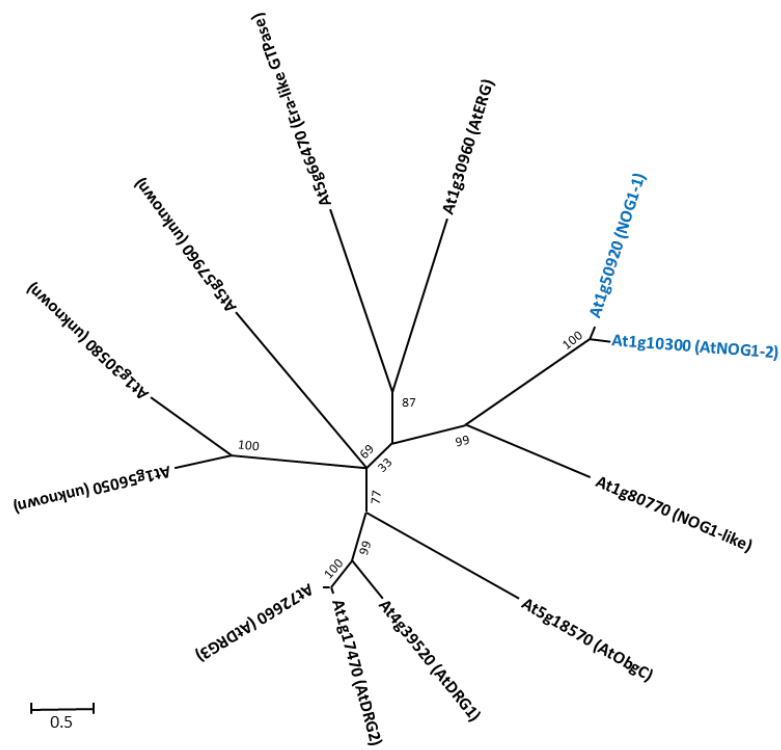

**B**

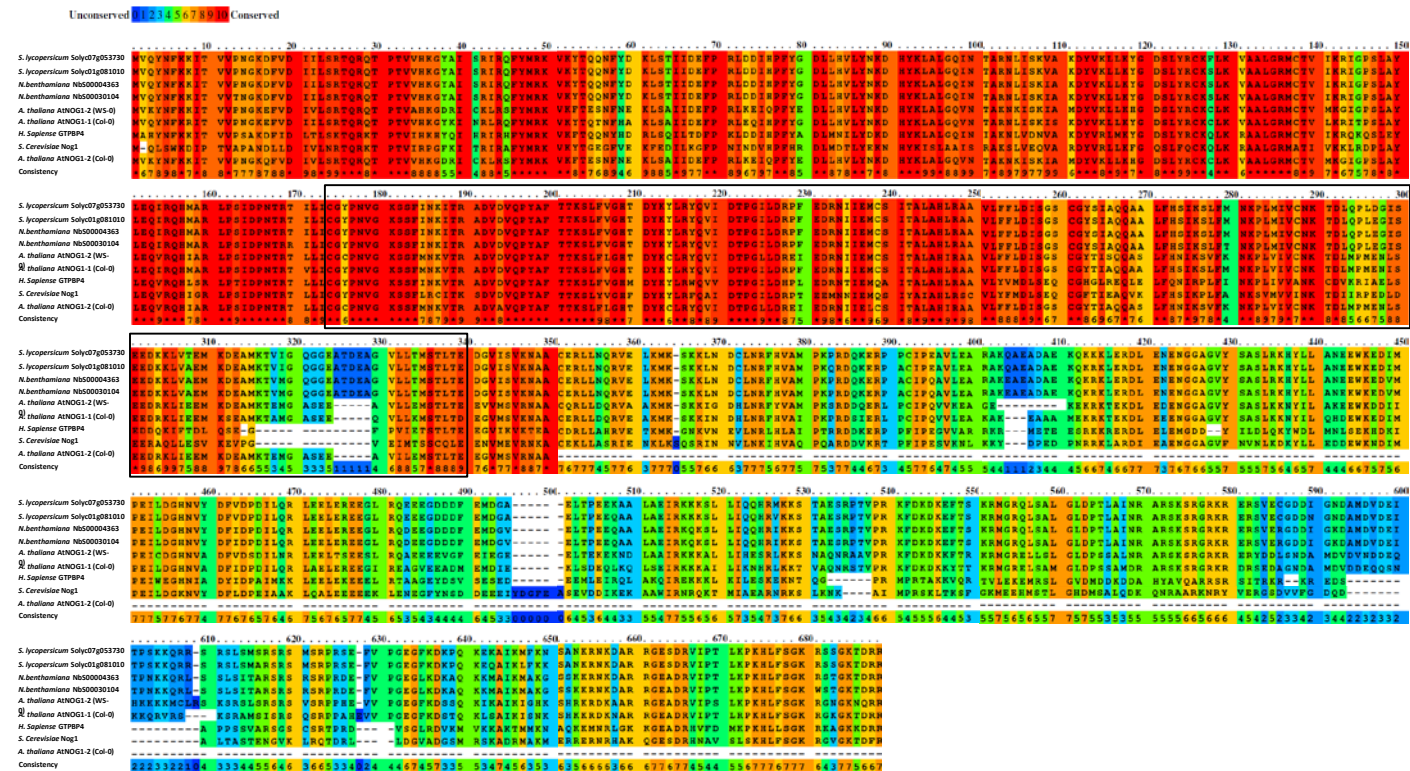

**Figure S2. Arabidopsis NOG1-1 and NOG1-2 are small GTP-binding family proteins Obg, DRG, and ERG.** (A) Arabidopsis proteins with sequence similarity to NOG1-1 and NOG1-2 were retrieved from the Arabidopsis genome and alignment was generated using ClustalW and the neighbor-joining tree was created. Branch lengths are proportional to the estimated evolutionary distance. Bootstrap values are included. (B) NOG1-1 and NOG1-2 are highly conserved among different organisms and have sequence similarity to the small GTP-binding family proteins OBG. Amino acid sequence alignment of NOG1-1 and NOG1-2, and orthologous genes in *N. benthamiana*, tomato, yeast and human. Sequence similarities are represented by different colored boxes. The predicted domain for GTPase is marked by a black box. Sequence alignment was generated using the PRALINE program (<http://www.ibi.vu.nl/programs/praline/www/>).

A

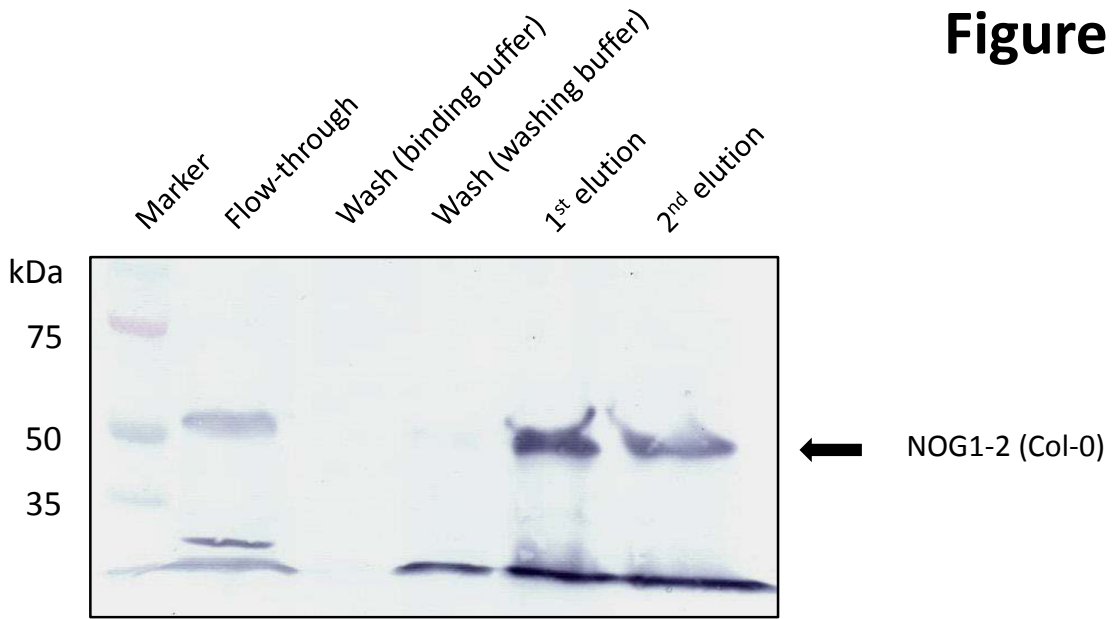

B

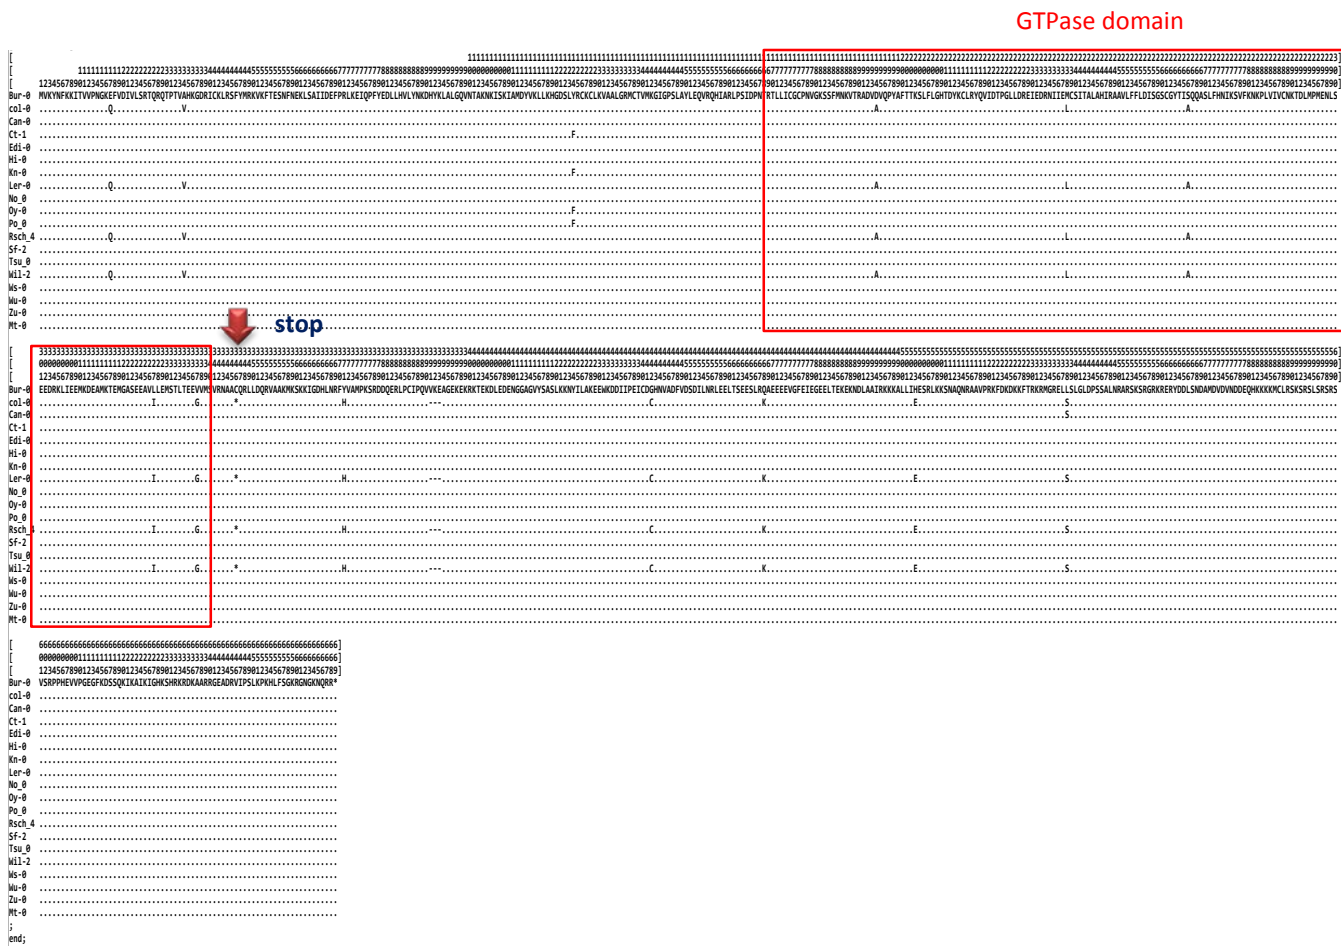

**Figure S3.** Amino acid sequence alignment of NOG1-1 and NOG1-2 among different Arabidopsis ecotypes, and expression of NOG1-2 protein *in vitro*.

(A and B) Early termination of NOG1-2 expression (truncated form of AtNOG1-2) in Col-0. The full length recombinant NOG1-2 (annotated Arabidopsis database, www.arabidopsis.org) was expressed in *E. coli*. Full lengths of Arabidopsis NOG1-2 cDNA were cloned into the pET59 vector (Novagen) to produce N-terminal His-tagged fusion protein. The plasmid was transformed into Rosetta *E. coli* strain (Novagen). Bacterial cells were grown in LB medium with 50µg/ml carbenicillin to a density of OD<sub>600</sub>=0.4-0.6. Expression of recombinant proteins was induced overnight at 19°C with 0.2mM IPTG. Proteins were extracted by using CellLytic B cell lysis buffer (Sigma-Aldrich) and purified using Ni-NTA agarose (Qiagen). The expression of NOG1-2 protein was confirmed by western blot using 6xHis antibody (A). The early termination of NOG1-2 is found in four ecotypes, Col-0, Ler-0, Rsch-4 and Wil-2 (B).

# Figure S4

## *pAtNOG1-1-GUS*

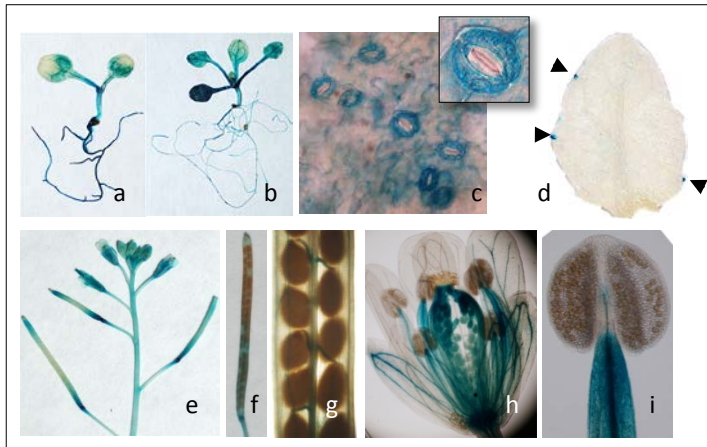

## *pAtNOG1-2-GUS*

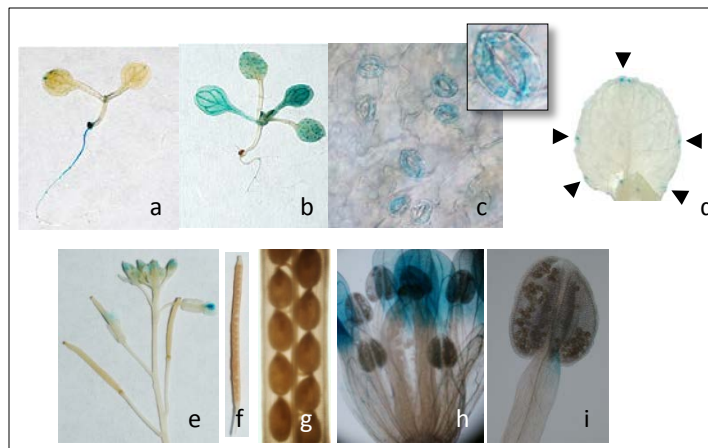

**Figure S4.** *NOG1-1* and *NOG1-2* promoter-GUS gene expression in different tissues of transgenic Arabidopsis.  $\beta$ -Glucuronidase (GUS) expression driven by *AtNOG1-1* and *AtNOG1-2* promoters in: one-week-old (a) and two-week old (b) seedlings expressing either *AtNOG1-1* or *AtNOG1-2* promoter fusions to GUS, grown on 1x MS medium. GUS expression was seen in guard cells (c) and hydathodes (d). GUS expression was also seen in floral parts (e, h), nectarines at the base of an early developing silique (g) and throughout a maturing silique (f) and anther (i). The T2 lines were used for total three independent experiment. Each experiment had 10 replications and showed similar results.

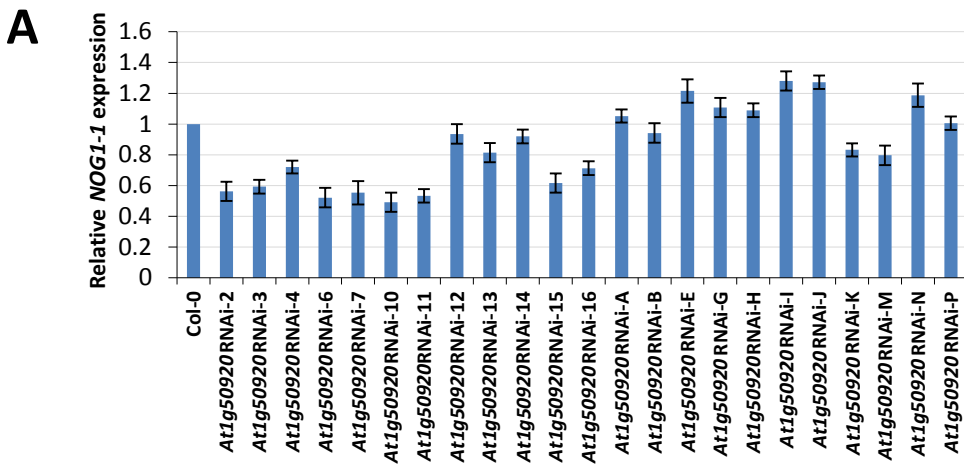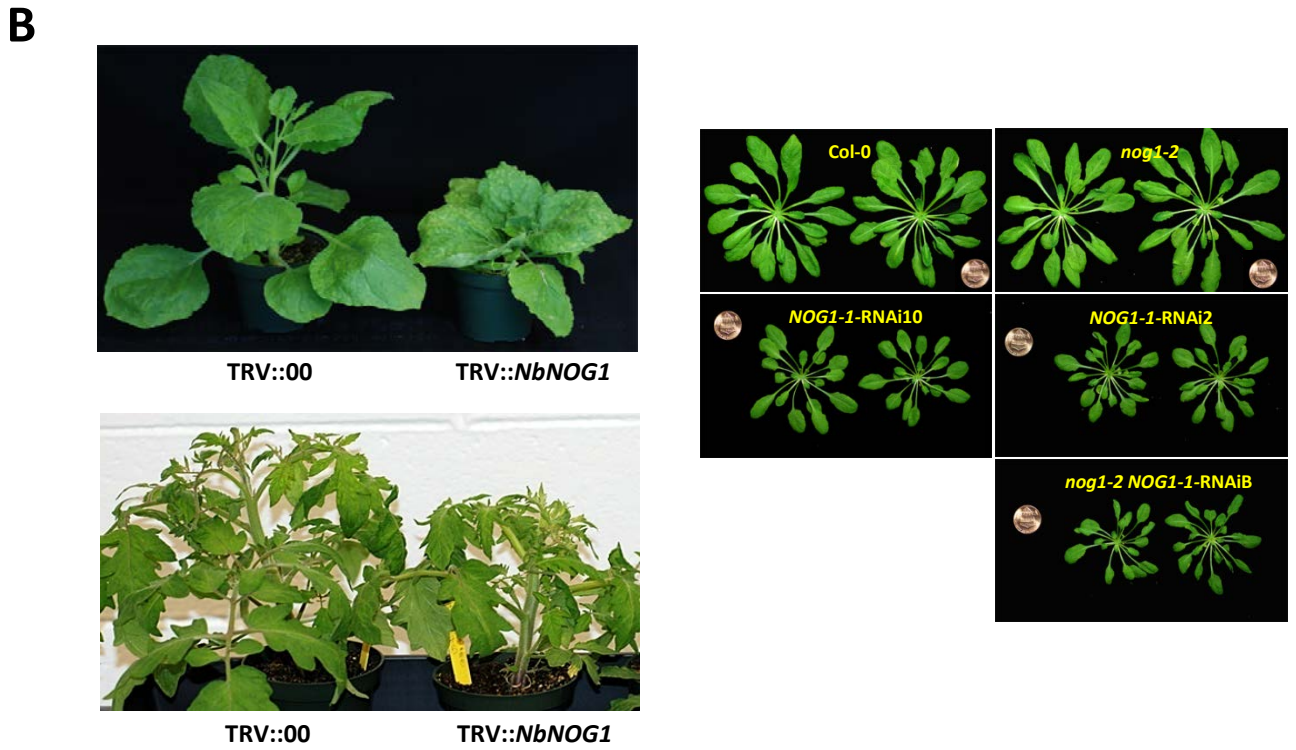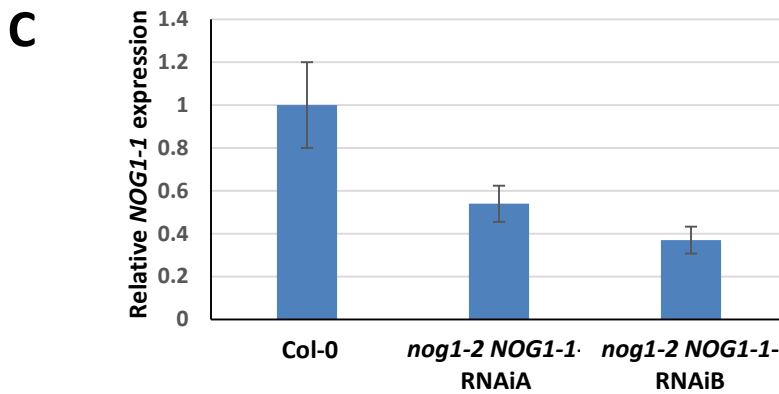

**Figure S5.** Down-regulation of *NOG1-1* (RNAi) and *NOG1-2* (*nog1-2*; T-DNA mutant), and phenotypes of *NOG1* silenced/mutant plants. (A) Wild-type Col-0 and 23 T1 plants containing the *NOG1-1* RNAi transgene were tested for expression of *NOG1-1* by qRT-PCR. The population of *NOG1-1*-RNAi transgenic lines were developed twice (1<sup>st</sup>; numeric order, and 2<sup>nd</sup>; alphabetic order) to obtain the most down-regulation of *NOG1-1*. (B) Mutation/downregulation of *NOG1-2* and *NOG1-1* inhibit plant development. (C) Down-regulation of *NOG1-1* was determined in two double mutant mimics, *nog1-2 NOG1-1-RNAiA* and *nog1-2 NOG1-1-RNAiB*. *AtUBQ5* was used as an internal control.



# Figure S7

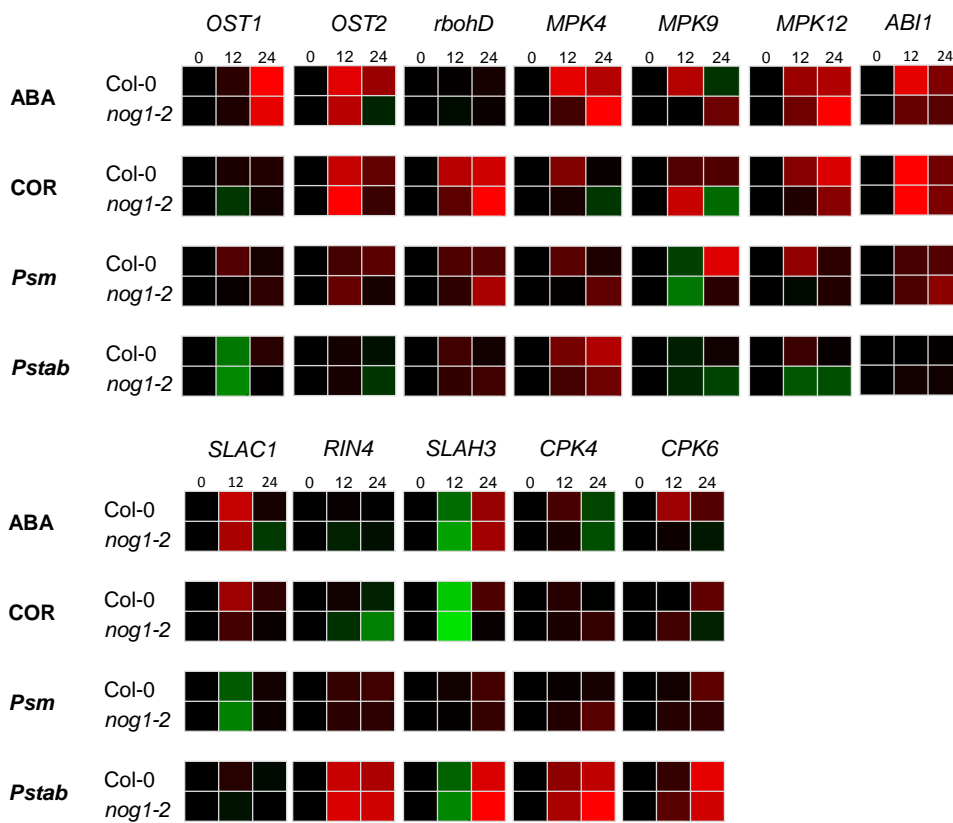

**Figure S7.** Determination of expression profiling of genes involved in guard cell signaling pathway in Col-0 and *nog1-2* after biotic and abiotic stress treatments. Three weeks old Arabidopsis seedlings grown in MS medium were inoculated with ABA, COR, *P. syringae* pv. *maculicola* (*Psm*) and *P. syringae* pv. *tabaci* (*Pstab*), and samples were collected at 0 hr, 12 hr, and 24 hr after inoculation for RNA extractions. qRT-PCR analysis was performed with three biological and technical replications. OST1: Open Stomata 1, rbohD: Respiratory Burst Oxidase Homologue D, MPK4: MAP Kinase, ABI1: ABA Insensitive 1, SLAC1: Slow Anion Channel-Associated 1, RIN4: Rpm1 Interaction Protein 4, SLAH3: SLAC1 Homologue 3, CPK4: Calcium-Dependent Protein Kinase 4 .



**Supplementary Table S2: Nucleotide sequences from 1100 to 1102 of AtNOG1-2 in various ecotypes**

| <b>Accession</b> | <b>Origin</b>            | <b>AIMS Stock Centre #</b> | <b>Nucleotide from 1100 to 1102 bp</b> |
|------------------|--------------------------|----------------------------|----------------------------------------|
| <b>Bur-0</b>     | Ireland                  | CS6643                     | TGT                                    |
| <b>Can-0</b>     | Canary Isles             | CS6660                     | TGT                                    |
| <b>Ct-1</b>      | Italy                    | CS6674                     | TGT                                    |
| <b>Edi-0</b>     | Scotland                 | CS6688                     | TGT                                    |
| <b>Hi-0</b>      | Netherlands              | CS6736                     | TGT                                    |
| <b>Kn-0</b>      | Lithuania                | CS6762                     | TGT                                    |
| <b>Ler-0</b>     | Poland, formerly Germany | CS20                       | <b>TGA</b>                             |
| <b>Mt-0</b>      | Libya                    | CS1380                     | TGT                                    |
| <b>No-0</b>      | Germany                  | CS6805                     | TGT                                    |
| <b>Oy-0</b>      | Norway                   | CS6824                     | TGT                                    |
| <b>Po-0</b>      | Germany                  | CS6839                     | TGT                                    |
| <b>Rsch-4</b>    | Russia                   | CS6850                     | <b>TGA</b>                             |
| <b>Sf-2</b>      | Spain                    | CS6857                     | TGT                                    |
| <b>Tsu-0</b>     | Japan                    | CS6874                     | TGT                                    |
| <b>Wil-2</b>     | Russia                   | CS6889                     | <b>TGA</b>                             |
| <b>Ws-0</b>      | Russia                   | CS6891                     | TGT                                    |
| <b>Wu-0</b>      | Germany                  | CS6897                     | TGT                                    |
| <b>Zu-0</b>      | Germany                  | CS6902                     | TGT                                    |
| <b>Col-0</b>     | Columbia                 | CS1092                     | <b>TGA</b>                             |

**Supplementary Table 4: List of primers used in this study**

| <b>Primers</b>                                                                         | <b>Sequences</b>                                        |                                                     |
|----------------------------------------------------------------------------------------|---------------------------------------------------------|-----------------------------------------------------|
| 31H3-B1                                                                                | GGGGACAAGTTTGTACAAAAAAGCAGGCTYYATGGTGCAGTATAATTTTAAG    | Cloning full length NbNOG1 in <i>N. benthamiana</i> |
| 31H3-B2                                                                                | GGGGACCACTTTGTACAAGAAAGCTGGGTCTAGCGCCGGTCAGTTTTCCAG     |                                                     |
| At1g10300-B1(S)                                                                        | GGGGACAAGTTTGTACAAAAAAGCAGGCTYYATGGTGAATATAATTTCAAGAAGA | Cloning full length AtNOG1-2 in Arabidopsis         |
| At1g10300-B2(S)                                                                        | GGGGACCACTTTGTACAAGAAAGCTGGGTCTAACGCCTTTGGTTTTTTCCA     |                                                     |
| At1g50920-B1                                                                           | GGGGACAAGTTTGTACAAAAAAGCAGGCTYYATGGTTCAATATAATTTCAAG    | Cloning full length AtNOG1-1 in Arabidopsis         |
| At1g50920-B2                                                                           | GGGGACCACTTTGTACAAGAAAGCTGGGTCTAACGCCTGTCCGTTTTTC       |                                                     |
| <b>Primers used for <i>NOG1-2</i> and <i>NOG1-1</i> gene expression in Arabidopsis</b> |                                                         |                                                     |
| At1g10300RT-F                                                                          | GTCACTAAGTGTATCAATTTCTGTGCAG                            | NOG1-2 expression, semi RT-PCR                      |
| At1g10300RT-R                                                                          | ACAGTACACATACGCCAAGAGCA                                 |                                                     |
| At1g50920qRT-F2                                                                        | GCTGACAGAGTTATACCAACGCTTAGACCG                          | NOG1-1 expression, real time PCR                    |
| At1g50920qRT-R2                                                                        | CTCTTGTTGGTTTCATCAACGCCTGTCCG                           |                                                     |
| At1g50920RT-F(3)                                                                       | GTGCCTGGTGAAGGATTCAAAGAC                                | NOG1-1 expression, real time PCR                    |
| At1g50920RT-R(3)                                                                       | CAGAGATTCTTCAACGGATCCAGC                                |                                                     |
| At1g10300RT-F(3)                                                                       | AGCAAGTCTAGAGGCAGAAAGAGG                                | NOG1-2 expression, real time PCR                    |
| At1g10300RT-R(3)                                                                       | TGAGCCCTTGTTACCTGATCACTG                                |                                                     |
| 10300qRT-F                                                                             | GTCGTGGAGAAGCAGACAGAGTTA                                | NOG1-2 expression, real time PCR                    |
| 10300qRT-R                                                                             | AGCCCTTGTTACCTGATCACTGGT                                |                                                     |
| At1g10300qRT-F2                                                                        | CACGTCGTGGAGAAGCAGACAGAGTTATAC                          | NOG1-2 expression, real time PCR                    |
| At1g10300qRT-R2                                                                        | GATGGCTTATACTAATGAGCCCTTGTTACC                          |                                                     |
| AtEF1a-qRTf                                                                            | TTCACCCTTGGTGTCAAGCA                                    | Internal control for real time PCR                  |
| AtEF1a-qRTTr                                                                           | TTTCATCGTACCTGGCCTTGGA                                  |                                                     |
| AtUBQ5 qRTf                                                                            | GCCGAAGAAGATCAAGCACAAGCA                                | Internal control for real time PCR                  |
| AtUBQ5 qRTTr                                                                           | ACTCCTTCCTCAAACGCTGAACCT                                |                                                     |
| AT1G10300gusGW-F                                                                       | GGGGACAAGTTTGTACAAAAAAGCAGGCTTCGTCGTATGCGGTAGTACGTAGTTG | NOG1-2 GUS expression in Arabidopsis                |
| AT1G10300gusGW-F                                                                       | GGGGACCACTTTGTACAAGAAAGCTGGGTTGTAGAGACGATGGTCATTTGGTCC  |                                                     |
| AT1G50920gusGW-F                                                                       | GGGGACAAGTTTGTACAAAAAAGCAGGCTTCAGAGACCTGCAACTGCAATA     | NOG1-1 GUS expression in Arabidopsis                |
| AT1G50920gusGW-F                                                                       | GGGGACCACTTTGTACAAGAAAGCTGGGTTGGGAACAACTGTGATCCTCTTGA   |                                                     |
| AT1G10300gfp-R                                                                         | GGGGACCACTTTGTACAAGAAAGCTGGGTTACGCCTTTGGTTTTTTCCA       | NOG1-2 GFP expression in Arabidopsis                |

AT1G50920gfp-R GGGGACCACTTTGTACAAGAAAGCTGGGTTACGCCTGTCGGTTTTTC  
 10300C-F GGGGACAAGTTTGTACAAAAAAGCAGGCTTCAAACCCTGGAAGCGCATTGTGT  
 10300C-R GGGGACCACTTTGTACAAGAAAGCTGGGTTAAGCAACGTAACCGACCCAGATTC

NOG1-2 complementation in Arabidopsis

**Primers used for gene expression profiling for hormonal defense and guard cell signaling**

AtPLDalpha-qrtF GCACGCCGTTTCATGATTTAC  
 AtPLDalpha-qrtR GCTAACATCAACCAGAGGTCAA  
 AtABI1-qrtF CGCAGGAGGGAAAAGTGATT  
 AtABI1-qrtR CTTGAAACCATCCATCATTCTCTG  
 AtBIK1-qrtF GCGATCCCGTCAAAGTGATA  
 AtBIK1-qrtR TTGGACTAGCTAGAGACGGT  
 AtABF3-qrtF TGGAGAAAGTGATTGAGAGAAGG  
 AtABF3-qrtR GAACTGGAAGCAGAAATTGCG  
 AtBAK1-qrtF TCTTTGATGTACCAGCTGAAGAG  
 AtBAK1-qrtR TGAACTACAAGTTGCTTCGGAT  
 AtFLS2-qrtF CGAAGATGGAAGCACCACA  
 AtFLS2-qrtR TCCAGAGTTTGCTTATATGAGGAA  
 AtBRI1-qrtF GTTCGATTCTGATGAGGTAGG  
 AtBRI1-qrtR CTCAGGCTATGTCAGCTCTTAC  
 SALK JAZ9 LP TCATGCTCATTGCATTAGTCG  
 SALK JAZ9 RP AGGGTTAAGTACGAAGGCAGC  
 AGB1-qrtF GAGGACACAGGAGAGTGATTTG  
 AGB1-qrtR TCCACAAACCGAACCTTACTT  
 AGG1-qrtF GAAGGACCAAATGGAGGAGAA  
 AGG1-qrtR CCTAGCAAGAACTAGTATATGTAACAC  
 AGG2-qrtF TGAATGCGACATGGGATCAA  
 AGG2-qrtR TTTGAGAGAAGGAAAGGAAGATCA  
 RGS1-qrtF GATGCAGTAGTCCCGGTTAAG  
 RGS1-qrtR GAAGGAAGATTACATGGATTGGATTG  
 ABI1-qrtF AGAGAGGAAGCAAAGACAACAT  
 ABI1-qrtR ACCCTCTCTGCCTCAGTT  
 FLS2-qrtF CGTAACGAGGATCGAGAAGTTT  
 FLS2-qrtR AGTATTCAACCTTCGTAACAGAGT  
 AtPLDalpha-qrtF TACCTGCCTCCAATCCTTACA

|                    |                             |
|--------------------|-----------------------------|
| AtPLDalpha-qrtR    | CAAAGCTACAACAGCAGCAAAG      |
| AtSLAC1-qrtf       | TTTGAAGCAGAGGAAGAGTC        |
| AtSLAC1-qrtr       | CATACAATATGCTATCTCACCTACT   |
| AtSLAH3-qrtf       | TCCGACAGCAGTCAGAGTAA        |
| AtSLAH3-qrtr       | TCGGATACGACTCTGTATTAGGG     |
| AtAHA1/AtOST2-qrtf | CGCAAAGCTAAAGGGATTGG        |
| AtAHA1/AtOST2-qrtr | CGGTAAATGTTTGTGTTGTTGTG     |
| AtRIN4-qrtf        | CGTGAAGAGAGAAGTTCTGGAG      |
| AtRIN4-qrtr        | CAAAGCAGCAACATGAGGAAG       |
| AtrbohD-qrtf       | CTACTGTGGAATGCCAGGAA        |
| AtrbohD-qrtr       | GAAGTTCTCTTTGTGGAAGTCAA     |
| AtCPK6-qrtf        | AAATGCTGGTGTAGGGAGAAG       |
| AtCPK6-qrtr        | ATTTGCATCCTCACCGAATAGA      |
| AtCPK4-qrtf        | CACAAGCAGCACTGCTAAATC       |
| AtCPK4-qrtr        | TTGTGAGTTCTCATTCTCAATTCC    |
| AtAHK5-qrtf        | GCAAATGGTATGGACTCGTTTATT    |
| AtAHK5-qrtr        | ATCTGAAATCTCAGTGCAAATACTG   |
| AtSID2-qrtf        | ACAGGGATAGTAGCTGGAAGT       |
| AtSID2-qrtr        | CTGTAGAGATGTTGTTGCTTCATATTC |
